# **Polygenic scores for intelligence, educational attainment and schizophrenia are differentially associated with core autism features, IQ, and adaptive behaviour in autistic individuals**

Varun Warriar<sup>1,3</sup>, Claire S Leblond<sup>2</sup>, Freddy Cliquet<sup>2</sup>, AIMS-2-TRIALS LEAP,  
Thomas Bourgeron<sup>2,4</sup>, and Simon Baron-Cohen<sup>1,3,4</sup>

1. Autism Research Centre, Department of Psychiatry, University of Cambridge
2. Human Genetics and Cognitive Functions, Institut Pasteur, UMR3571 CNRS, Université de Paris, Paris, France
3. Correspondence to Varun Warriar ([vw260@medschl.cam.ac.uk](mailto:vw260@medschl.cam.ac.uk)) or Simon Baron-Cohen ([sb205@cam.ac.uk](mailto:sb205@cam.ac.uk)).
4. These authors jointly directed this work

Word count = 3,427

## **Abstract**

### **Importance**

Schizophrenia, educational attainment, and intelligence are all genetically correlated with autism. However, autism is a complex condition, with several different core (such as social communication difficulties and repetitive and restricted behaviour) and associated features (such as IQ and adaptive behaviour) contributing to the underlying heterogeneity. It is unknown to what extent polygenic scores (PGS) for these three phenotypes are associated with the core and associated autism features.

### **Objective**

To investigate the association of PGS for intelligence, educational attainment and schizophrenia on core autism features, IQ and adaptive behaviour in autistic individuals. To further investigate the effects of stratifying by sex and IQ on these associations.

### **Design**

PGS association for the three phenotypes with 12 different autism core and associated features in three cohorts followed by meta-analysis. We additionally conducted sensitivity analyses by stratifying for sex and IQ.

### **Settings:**

Three cross-sectional, multi-centre cohorts comprising autistic with genotype data, and phenotypic information.

### **Participants**

Autistic individuals (total N: 2,512 – 3,681) from three different cohorts: Simons Simplex Collection ( $N_{\max} = 2,233$ ), Autism Genetic Research Exchange ( $N_{\max} = 1,200$ ), and AIMS-2-TRIALS LEAP ( $N_{\max} = 262$ )

### **Main outcome measures**

Association of PGS for intelligence, educational attainment, and schizophrenia with core autism features, measures of intelligence, and adaptive behaviour in autistic individuals

### **Results**

We identified a similar pattern of correlation among core and associated autism features across all three cohorts. Cluster analyses of these features identified two broad clusters – one consisting of the core features, and another consisting of IQ and adaptive behaviour. PGS for intelligence were only associated with measures of intelligence and adaptive behaviour (e.g. for full-scale IQ, Beta = 0.08, 95%CI = 0.11 – 0.04) for PGS for educational attainment were associated for measures of intelligence, adaptive behaviour, and additionally, non-verbal communication as measured by ADI – a core-autism feature (e.g. for full-scale IQ, Beta = 0.05, 95%CI = 0.08 – 0.02; for ADI non-verbal communication, Beta = 0.05, 95%CI = 0.09 – 0.01). Finally, PGS for schizophrenia were associated with two core autism features: restricted and repetitive behaviour and verbal communication difficulties as measured by the

ADI-R (e.g. for ADI restricted and repetitive behaviour: Beta = 0.06, 95%CI = 0.09 – 0.02). Most of these associations were also significant when restricting it to males only or to individuals with IQ > 70. We find limited evidence for heterogeneity between cohorts.

### **Conclusion and relevance**

We identify specific and different patterns of association between PGS for the three phenotypes and core and associated autism features. This provides greater resolution into the shared genetics between autism and the three phenotypes, and suggests one method to investigate heterogeneity in autism and co-occurring conditions.

## Key Questions

**Question:** Are polygenic scores (PGS) for intelligence, educational attainment, and schizophrenia differentially associated with core autism features, IQ, and adaptive behaviour in autistic individuals?

**Findings:** Across three cohorts, we identify that PGS for intelligence, educational attainment and schizophrenia are associated with different features in autistic individuals. PGS for intelligence were primarily associated with adaptive behaviour and IQ, PGS for schizophrenia were associated with some core autism features, whilst PGS for educational attainment were associated with IQ, adaptive behaviour, and some core autism features.

**Meaning:** Our findings suggest that the shared genetics between autism and intelligence, educational attainment, and schizophrenia emerge primarily from specific of core and associated features which are different for the three sets of PGS tested.

## 1 Introduction

2 Autism is a set of complex and heterogeneous neurodevelopmental conditions  
3 characterised by difficulties in social communication, unusually repetitive and restricted  
4 behaviour and interests, difficulties adjusting to unexpected change, and altered sensory  
5 processing (1,2). Autism also frequently co-occurs with other medical, neurodevelopmental,  
6 or mental health conditions (3,4). Autism is substantially heritable, with twin and familial  
7 heritabilities between 50–90% (5–8). Significant progress has been made in identifying  
8 common genetic variants (9) and genes enriched for rare and protein truncating variants  
9 associated with autism (10–12). Additionally, genome-wide association studies (GWAS)  
10 have identified shared genetics between autism and a number of other phenotypes, including  
11 schizophrenia ( $r_g = 0.24 \pm 0.04$ ), educational attainment ( $r_g = 0.20 \pm 0.02$ ), and intelligence ( $r_g$   
12  $= 0.22 \pm 0.03$ ) (9,13).

13  
14 Autism is unlikely to be a single condition but a composite of multiple, partly  
15 dissociable core features (e.g. social interaction and communication difficulties, and  
16 restricted interested and repetitive behaviour) and associated features like difficulties in  
17 adaptive behaviour and a wide IQ range (14–19). These core and associated features  
18 contribute to heterogeneity in autism and are associated with differential outcomes in autistic  
19 individuals (20,21). Therefore, investigating the genetics of autism as a single phenotype may  
20 provide incomplete information about prognosis and outcomes in autistic individuals.

21  
22 While schizophrenia, educational attainment, and intelligence are all genetically  
23 correlated with autism, we still do not know which core and associated features of autism  
24 these phenotypes are genetically correlated with. In other words, are polygenic scores (PGS)  
25 for these phenotypes associated with all core and associated autism features, or are they  
26 associated with only some of the core and associated features? Finally, how do other sources  
27 of heterogeneity such as participants' IQ or sex affect these associations? This can provide  
28 better resolution of the shared genetics between various core and associated features and  
29 other co-occurring conditions, and identify axes to potentially stratify autistic individuals  
30 along to provide better care and support.

31  
32 To address these questions, we investigated the association of PGS for three well-  
33 powered GWAS (intelligence, educational attainment and schizophrenia) with 12 different  
34 core and associated autism features in 2,512 – 3,681 autistic individuals from three cohorts.  
35 These 12 features represent the core aspects of autism such as restricted and repetitive  
36 behaviour and interests, and social interaction and communication difficulties, and associated  
37 features such as measures of IQ and adaptive behaviour. We additionally conduct sensitivity  
38 analyses by stratifying for males and individuals with  $IQ > 70$ , and investigate differences in  
39 PGS associations between cohorts.

40  
41  
42  
43

## 44 **Methods**

### 45 **Overview of the cohorts**

46 We conducted PGS analyses in three cohorts of autistic individuals: The Simons  
47 Simplex Collection (SSC) (22), the Autism Genetic Resource Exchange (AGRE, CHOP  
48 sample) ( $N_{\max} = 1,200$ ) (23), and the AIMS-2-TRIALS LEAP sample ( $N_{\max} = 262$ ) (24).  
49 Participants in all three cohorts were recruited across multiple sites. For each cohort, we  
50 restricted our analyses to autistic individuals who passed the genetic quality control and who  
51 had the relevant phenotype, resulting in a total sample size ranging from 2,512 - 3,681. We  
52 compare the demographic characteristics of these cohorts in **Table 1**. Further details of these  
53 cohorts are provided in the **eMethods 1**.

54

55

*Insert Table 1 here*

56

### 57 **Genetic quality control, imputation, and polygenic score generation**

58 Full details of the genetic quality control are provided in **eMethods2**. Briefly, quality  
59 control was conducted for each cohort separately, by array. We excluded participants with  
60 genotyping rate  $< 95\%$ , excessive heterozygosity ( $\pm 3$  standard deviations from the mean),  
61 who were not of European ancestry as identified using multidimensional scaling, had  
62 mismatched genetic and reported sex, and families with Mendelian errors  $> 10\%$ . SNPs were  
63 excluded with genotyping rate  $< 10\%$ , or deviated from Hardy-Weinberg equilibrium ( $p$ -  
64 value  $< 1 \times 10^{-6}$ ). Imputation was conducted using Michigan Imputation Server (25) using the  
65 1000 genomes Phase 3 v5 as the reference panel (26) (for AGRE and SSC) or using HRC  
66 r1.1 2016 reference panel (for AIMS-2-TRIALS). SNPs with minor allele frequency  $< 1\%$  or  
67 an imputation  $r^2 < 0.6$  were excluded.

68

69 GWAS used to generate PGS were identified *a priori* using statistical power analyses  
70 (27) using [https://eagenetics.shinyapps.io/power\\_website/](https://eagenetics.shinyapps.io/power_website/). Details of parameters used are  
71 provided in **eTable 1**. We assumed a SNP heritability of 0.15 for the core and associated  
72 autism features and a sample size of 3,000. We conducted power analyses for seven relatively  
73 well-powered GWAS that are genetically correlated with autism. The GWAS for autism (9)  
74 was excluded as this overlaps with the SSC and AGRE datasets. We subsequently restricted  
75 our analyses to only GWAS that had around 80% statistical power at a genetic correlation of  
76 0.25 or greater than 60% power at a genetic correlation of 0.2, which is similar to the genetic  
77 correlation between autism and educational attainment, intelligence and schizophrenia. Three  
78 phenotypes met our criteria: 1. Educational attainment (28) ( $N = 766,345$ , excluding the  
79 23andMe dataset), 2. Intelligence (29) ( $N = 269,867$ ), and 3. Schizophrenia (30) (56,418  
80 cases and 78,818 controls). All three GWAS are genetically correlated with autism, and PGS  
81 for these GWAS are over-transmitted from parents to autistic children (13), suggesting that  
82 the observed genetic correlations with autism are not due to other confounding factors such as  
83 ascertainment bias.

84

85 PGS were generated for three phenotypes using PRSice2 (31), using independent  
86 SNPs (clumping  $r^2$  of 0.1 and 250 kb) present in both the GWAS and the testing datasets.

87 Given the limited testing sample size and the number of tests conducted, we chose *a priori* p-  
88 value thresholds that explained maximum variance in the three phenotypes:  $p \leq 1$  for the  
89 educational attainment and intelligence GWASs (28,29), and  $p \leq 0.1$  (30) for the  
90 schizophrenia GWAS. The total number of SNPs included are provided in **eTable 2**.

91

## 92 **Autism core and associated features**

93 We identified 12 autism core and associated features that are: 1. Widely used in studies  
94 related to autism; 2. Are a combination of parent-, self-, other-report and performance-based  
95 measures to investigate if reporter status affects the PGS association, 3. Collected in all three  
96 cohorts; and 4. Cover a range of core and associated features in autism. Details of each  
97 feature is provided in the **eMethods 3**. The core features are:

98

- 99 1. ADOS: Social Affect (ADOS SA)
- 100 2. ADOS: Restricted and Repetitive Behaviour domain total score (ADOS RRB)
- 101 3. ADI: Communication (verbal) domain total score\* (ADI VC)
- 102 4. ADI: Communication (nonverbal) domain total score\* (ADI NVC)
- 103 5. ADI: Restricted and repetitive behaviour domain total score (ADI RRB)
- 104 6. ADI: Social domain total score (ADI SOC)
- 105 7. Repetitive Behaviour Scale – Revised (RBS)
- 106 8. Parent-reported Social Responsiveness Scale: Total raw scores (SRS)

107

108 The associated features are :

- 109 1. Vineland Adaptive Behaviour Composite Standard scores (VABS)
- 110 2. Full-scale IQ (FSIQ)
- 111 3. Verbal IQ (VIQ)
- 112 4. Non-verbal IQ (NVIQ)

113

114 \* Verbal and non-verbal communication scores were not separately calculated in the AIMS2-  
115 TRIALS-LEAP dataset. We thus used a total communication score and meta-analysed it with  
116 the verbal and non-verbal communication scores in the other two cohorts.

117

## 118 **Statistical analyses**

119 For each cohort, PGS were regressed against the autism features with sex and the first  
120 15 genetic principal components as covariates in all analyses, with all variables standardised  
121 (mean = 0, standard deviation = 1). Additionally, age of participants in the AIMS-2-TRIALS  
122 LEAP cohort, and genotype array in the SSC cohort were included as covariates. Age at  
123 completion of each measure was only available in the AIMS-2- TRIALS LEAP dataset. IQ  
124 type and ADOS module were included as additional covariates. For SSC and AIMS-2-  
125 TRIALS LEAP as only unrelated individuals were included, a linear model was used. AGRE  
126 includes a large number of multiplex families with multiple autistic individuals per family.  
127 Thus, to retain all participants, we used linear mixed effects regression with family ID  
128 included as a random intercept to account for relatedness between individuals.

129 Effect sizes were meta-analysed across the three cohorts using inverse variance  
130 weighted meta-analyses with the following formula:

$$w_i = 1/SE_i^2$$
$$SE_{meta} = \sqrt{1/\sum_i w_i}$$
$$Beta_{meta} = \sum_i \beta_i w_i / \sum_i w_i$$

131  
132 Where  $\beta_i$  is the standardized regression coefficient of the PGS,  $SE_i$  is the associated standard  
133 error, and  $w_i$  is the weight. p-values were calculated from Z scores ( $Beta_{meta}/SE_{meta}$ ).  
134

135 Variance explained was estimated ( $R^2$ ) by squaring the  $Beta_{meta}$ . Given the high  
136 correlation between the autism features and phenotypes, we used Benjamini-Hochberg False  
137 Discovery Rates to correct for multiple testing (q-value < 0.05).  
138

139 Core and associated autism features are quantitatively and qualitatively different  
140 between sexes (32). Further, autistic individuals with co-occurring ID are enriched for rare  
141 and *de novo* protein-truncating variants (PTV) (33,34), suggesting that some of the variation  
142 in these phenotypes may be attributed to this class of genetic variants in these individuals  
143 (35,37). So, we conducted sensitivity analyses by restricting the samples to only males (N =  
144 3,040 – 2,125) or individuals with IQ > 70 (N = 2,319 – 1,801). We did not test for  
145 association between FSIQ and VIQ and the three PGS in the AGRE in the two sensitivity  
146 analyses, as fewer than 20 individuals had scores on these measures. We followed the same  
147 statistical analysis pipeline for the two sensitivity analyses, and identified significant  
148 associations using Benjamini-Hochberg FDR correction (q-value < 0.05).  
149

150 To understand how the features correlated with each other, we conducted Pearson's  
151 correlation analyses followed by hierarchical clustering for each cohort (**eMethods 4**).  
152

153 All analyses were conducted in R. Data and software availability is provided in  
154 **eMethods 5**.  
155

## 156 **Ethics**

157 We received ethical approval to access and analyse de-identified genetic and  
158 phenotypic data from the three cohorts from the University of Cambridge Human Biology  
159 Research Ethics Committee.  
160

## 161 162 **Results**

### 163 164 **Phenotypic correlation in the three cohorts**

165 Pearson's correlation produced a similar correlation profile across all three cohorts  
166 with two clusters – a core autism cluster with all core autism features, and an associated  
167 feature cluster with all three IQ measures and VABS (**Figure 1, eFigures 1 – 3, eTables 3 -**



168 5). The two clusters were largely negatively correlated with each other. Within the autism  
169 cluster, hierarchical clustering suggested that instrument type had primacy over domain. For  
170 instance, the ADOS subscales clustered closely together, and as did the two parent-report  
171 measures (SRS and RBS).

172

173

*Insert Figure 1 here*

174

175 Correlation analyses of the correlation coefficients across pairs of features identified  
176 high correlations for all three pairs (SSC-AGRE:  $r = 0.89$ ,  $p\text{-value} < 2 \times 10^{-16}$ ; SSC-AIMS-2-  
177 TRIALS LEAP:  $r = 0.92$ ,  $p\text{-value} < 2 \times 10^{-16}$ ; and AGRE – AIMS-2-TRIALS LEAP:  $r = 0.92$ ,  
178  $p\text{-value} < 2 \times 10^{-16}$ ) (**Figure 2**).

179

180

*Insert Figure 2 here*

181

### 182 **Polygenic score analyses**

183 PGS for intelligence were positively associated with all measures of IQ and VABS  
184 with concordant effect direction in all cohorts: FSIQ (Beta =  $0.08 \pm 0.02$ ,  $q\text{-value} = 6.69 \times 10^{-4}$ ,  
185  $R^2 = 0.63\%$ ), VIQ (Beta =  $0.06 \pm 0.02$ ,  $q\text{-value} = 5.21 \times 10^{-3}$ ,  $R^2 = 0.37\%$ ), NVIQ (Beta =  
186  $0.09 \pm 0.02$ ,  $q\text{-value} = 3.82 \times 10^{-5}$ ,  $R^2 = 0.77\%$ ), and VABS (Beta =  $0.06 \pm 0.02$ ,  $q\text{-value} =$   
187  $1.91 \times 10^{-2}$ ) (**Figure 3 and eTable 6**).

188

189 Similarly, PGS for educational attainment were positively associated with all  
190 measures of IQ and VABS with concordant effect direction in all cohorts: FSIQ (Beta =  
191  $0.06 \pm 0.02$ ,  $q\text{-value} = 2.36 \times 10^{-3}$ ,  $R^2 = 0.30\%$ ), VIQ (Beta =  $0.06 \pm 0.01$ ,  $q\text{-value} = 6.69 \times 10^{-4}$ ,  $R^2$   
192  $= 0.32\%$ ), NVIQ (Beta =  $0.05 \pm 0.01$ ,  $p\text{-value} = 7.57 \times 10^{-3}$ ,  $R^2 = 0.21\%$ ), and VABS (Beta =  
193  $0.04 \pm 0.02$ ,  $q\text{-value} = 4.53 \times 10^{-2}$ ,  $R^2 = 0.20\%$ ) (**Figure 3 and eTable 6**). There were no  
194 statistically significant differences in effect sizes between the PGS for education and  
195 intelligence for all measures of IQ.

196

197 Interestingly, PGS for educational attainment were also positively associated with  
198 scores on the verbal and non-verbal communication subscales of the ADI, though the effect  
199 directions were not concordant in the three cohorts (ADI NVC: Beta =  $0.05 \pm 0.02$ ,  $q\text{-value} =$   
200  $3.23 \times 10^{-2}$ ,  $R^2 = 0.26\%$  ADI VC: Beta =  $0.05 \pm 0.02$ ,  $q\text{-value} = 2.69 \times 10^{-2}$ ,  $R^2 = 0.27\%$ ) (**Figure**  
201 **3 and eTable 6**). Higher scores on the ADI are associated with more difficulties with  
202 communication.

203

204 PGS for schizophrenia were positively associated with two ADI subscales (ADI RRB:  
205 Beta =  $0.06 \pm 0.02$ ,  $q\text{-value} = 5.21 \times 10^{-3}$ ,  $R^2 = 0.39\%$ , ADI NVC: Beta =  $0.05 \pm 0.02$ ,  $q\text{-value} =$   
206  $3.23 \times 10^{-2}$ ,  $R^2 = 0.32\%$ ) (**Figure 3 and eTable 6**). The effect direction was concordant in all  
207 three cohorts for ADI RRB but not for ADI NVC (**eTable 6**).

208

209

*Insert Figure 3 here*

210

### 211 **Assessing heterogeneity across cohorts and polygenic scores**

212 We next conducted binomial sign test to investigate effect direction concordance  
213 between the three cohorts. Formal tests of heterogeneity are likely to be biased given the  
214 small number of studies included (36), so we assessed heterogeneity using sign tests  
215 assessing effect directions. 32 out of 36 tests had concordant effect direction between the  
216 SSC and the AGRE cohorts ( $p$ -value =  $1.94 \times 10^{-6}$ , binomial sign test), 21 out of 30 between  
217 the SSC and AIMS-2-TRIALS ( $p$ -value = 0.04), and 22 out of 30 between the AGRE and the  
218 AIMS-2-TRIALS dataset ( $p$ -value = 0.01), suggesting largely similar effect directions across  
219 cohorts.

220

221 We also investigated the concordance of effect direction between the three sets of  
222 PGS for the 12 features tested using the meta-analysed effect direction. All 12 tests had  
223 concordant effect direction between the PGS for educational attainment and intelligence ( $p$ -  
224 value =  $4.8 \times 10^{-4}$ , binomial sign test), but only 6 of 12 has concordant effect direction between  
225 PGS for schizophrenia and both educational attainment and intelligence ( $p$ -value = 1). This is  
226 expected given the high genetic correlation between intelligence and educational attainment  
227 ( $r_g = 0.72 \pm 0.011$ ), but the low genetic correlation between schizophrenia and intelligence ( $r_g$   
228 =  $-0.21 \pm 0.025$ ) and educational attainment ( $r_g = 0.01 \pm 0.017$ ).

229

### 230 **Sensitivity analyses**

231 As the AIMS-2-TRIAL LEAP dataset significantly differed from the AGRE and the  
232 SSC datasets in terms of fraction of female autistic or autistic individuals with  $IQ < 70$ , we  
233 conducted two sensitivity analyses (**Methods**). In the males-only analyses, PGS for  
234 intelligence were associated with FSIQ and NVIQ (**eFigure 4** and **eTable 7**). PGS for  
235 educational attainment were associated with the two ADI communication subscales, RBS,  
236 FSIQ, and VIQ. Finally, PGS for SCZ were associated with ADI: RRB.

237

238 In the  $IQ > 70$  analyses, PGS for intelligence and educational attainment were  
239 associated with FSIQ, VIQ, and NVIQ. Notably, the variance explained in this subset of  
240 individuals for these three phenotypes were 2 – 3 times higher than the variance explained in  
241 the primary analyse. Additionally, PGS for educational attainment were associated with  
242 scores on the VABS, RBS, and ADI: NVC. Finally, PGS for schizophrenia were  
243 significantly associated with ADI: RRB and NVIQ (**eFigure 5** and **eTable 8**). In both  
244 sensitivity analyses, the effect directions were concordant for all significant associations.

245

246

### 247 **Discussion**

248 Given demographic differences between the three cohorts, we first compared the  
249 patterns of phenotypic correlations for the core and associated autism features in the three  
250 cohorts, and identified a similar pattern in all three datasets. The core features clustered  
251 together, and the measures of intelligence and adaptive behaviour clustered together. This  
252 was confirmed by high Pearson's correlation between pairs of features across the three  
253 cohorts.

254

255 PGS for the three phenotypes were differentially associated with the features tested.  
256 Specifically, PGS for educational attainment and intelligence were positively associated with  
257 all three measures of IQ and VABS. The shared genetics between VABS and educational  
258 attainment and intelligence is unsurprising, given the modest to substantial phenotypic  
259 positive correlations between VABS and measures of IQ in the three cohorts ( $r = 0.36$  to  
260  $0.68$ ). Sensitivity analyses in autistic individuals with  $IQ > 70$  confirmed the association  
261 between the measures of IQ and PGS for educational attainment and intelligence. Previous  
262 research has suggested that protein truncating rare and *de novo* variants are negatively  
263 associated with measures of IQ and scores on the VABS in autistic individuals (10,33,39),  
264 though these sets of variants are enriched in individuals with  $IQ < 70$ . In contrast, in our  
265 analyses, PGS for educational attainment and intelligence explained a greater proportion of  
266 variance in measures of IQ in autistic individuals with  $IQ > 70$  compared to all autistic  
267 individuals, suggesting a more prominent role for PGS in measures of IQ in autistic  
268 individuals without intellectual disability. Taken together, our analyses suggest that in autistic  
269 individuals, similar to the general population (28,29,38), genetic variants across the allelic  
270 frequency spectrum contribute to differences in IQ and related measures, but the relative  
271 contribution of different sets of genetic variants may differ based on intellectual disability.

272  
273 PGS for educational attainment were also associated with higher scores on the two  
274 ADI communication subdomains (verbal and non-verbal communication), which is in the  
275 opposite direction to what's been observed between social and communication difficulties  
276 and educational attainment in the general population ( $r_g = -0.30 \pm 0.11$ ,  $P = 0.007$ ) (18).  
277 Sensitivity analyses restricting to either males or individuals with  $IQ > 70$  also identified  
278 significant associations between PGS for educational attainment and ADI communication  
279 subdomains with concordant effect direction across all three datasets. This inversion in effect  
280 direction between social and communication difficulties and educational attainment in the  
281 typical population and autistic individuals must be further investigated. In the two sensitivity  
282 analyses PGS for educational attainment were negatively associated with scores on the RBS,  
283 though this was only nominally significant in the non-stratified analyses. The variance  
284 explained by the PGS for educational attainment for RBS-R in the subgroups was 2 – 2.5x  
285 the variance explained in the primary analyses, highlighting, yet again, heterogeneity within  
286 the autism spectrum based on IQ and sex.

287  
288 PGS for schizophrenia, on the other hand, were positively associated with scores on  
289 ADI: RRB and ADI: NVC. However, only the association with ADI: RRB was significant in  
290 the two sensitivity analyses. In the general population, there is some evidence to suggest that  
291 PGS for schizophrenia are associated with social and communication difficulties (40,42).  
292 However, to our knowledge, this is the first report linking PGS for schizophrenia with  
293 restricted and repetitive behaviour, though RRBs are elevated in individuals with  
294 schizophrenia (41).

295  
296 The sample size for each individual cohort was limited, and the number of cohorts  
297 were small excluding the possibility of conducting formal tests of heterogeneity between  
298 cohorts. However, analyses of effect direction of the three sets of PGS revealed broad

299 similarities between cohorts, with notably high concordance in effect direction between the  
300 AGRE and the SSC cohorts. This is notable given the substantial differences in demographic  
301 characteristics between the cohorts, and potential differences in the SNPs used to generate the  
302 polygenic scores for the three cohorts.

303

304 Comparing the physical correlations to the effect direction of the PGS further helps to  
305 elucidate the differences between the three sets of PGS. Whilst PGS for SCZ is positively  
306 associated with the autism core features, and negatively with the associated features, the PGS  
307 for educational attainment and IQ were positively associated with most features tested.  
308 Notably, PGS for schizophrenia were *significantly associated* with some autism core features,  
309 PGS for intelligence were *significantly associated* with all associated features, whereas PGS  
310 for educational attainment were *significantly associated* with all associated features and some  
311 autism core features suggesting differential association. However, we note that the statistical  
312 significance of these associations will be influenced by sample size. In other words, larger  
313 sample sizes may identify other associations between the PGS and the features.

314

315 Our study also provides a cautionary note about instrument bias which is reflected in  
316 the PGS associations. For example, restricted and repetitive behaviours are primarily  
317 measured here using RBS, ADI-RRB and ADOS-RRB. The phenotypic correlations between  
318 these are low to modest ( $r : 0.11 - 0.48$ ). Further, SCZ PGS are only associated with ADI-  
319 RRB, and PGS for educational attainment are only associated with RBS (in the sensitivity  
320 analyses). Together this suggests that idiosyncratic and systematic differences (e.g. reporter  
321 bias, number of questions) makes it challenging to compare different core and associated  
322 features even if they are meant to capture the same underlying latent trait. Phenotypically,  
323 this manifests as modest correlations, and genetically this suggests different underlying  
324 genetic architectures for these features, both of which have been demonstrated before (43-  
325 45).

326

## 327 **Limitations**

328

329 Whilst the largest study to date, we were statistically well powered to investigate the  
330 shared genetics only with three phenotypes, and were not well-powered to explore the co-  
331 variance explained at multiple different p-value thresholds in the training datasets. Larger  
332 datasets may identify additional significant associations between the current PGS and  
333 features tested. Further, whilst well powered, PGS still do not account for all the SNP  
334 heritability. We also do not examine the role of rare and low-frequency variants in this study,  
335 which are also associated with autism and the three phenotypes (33,38,46). Finally, each  
336 many phenotypes included in the study (e.g. SRS and RBS-R) can be further divided into  
337 additional subdomains based on factor analyses or evaluating the items included. A  
338 comprehensive investigation across all subdomains is warranted, yet is only possible with  
339 additional datasets that provide sufficient statistical power.

340

## 341 **Conclusions**

342 Core and associated autism features are differentially associated with PGS for  
343 intelligence, educational attainment, and schizophrenia. We find limited evidence for  
344 heterogeneity between cohorts despite differences in demographic characteristic, though  
345 stratifying for males and IQ > 70 identified additional associations with PGS. Our study  
346 provides insights into the underlying heterogeneity in autism, and provides greater resolution  
347 to the shared genetics between autism and intelligence, educational attainment, and  
348 schizophrenia.

349

## 350 **Acknowledgements**

351

352 V.W. is funded by St. Catharine's College, Cambridge. This study was funded by  
353 grants to SBC from the Medical Research Council, the Wellcome Trust, the Autism Research  
354 Trust, the Templeton World Charity Foundation, and to T.B. from the Institut Pasteur, the  
355 CNRS, The Bettencourt-Schueller and the Cognacq-Jay Foundations, the APHP and the  
356 Université de Paris. SBC was funded by the Autism Research Trust, the Wellcome Trust, the  
357 Templeton World Charitable Foundation, and the NIHR Biomedical Research Centre in  
358 Cambridge, during the period of this work. The Medical Research Council (MRC) funded the  
359 Cambridge Autism Research Database (CARD) that made this study possible. SBC also  
360 received funding from the Innovative Medicines Initiative 2 Joint Undertaking (JU) under  
361 grant agreement No 777394. The JU receives support from the European Union's Horizon  
362 2020 research and innovation programme and EFPIA and AUTISM SPEAKS, Autistica,  
363 SFARI. His research was also supported by the National Institute of Health Research (NIHR)  
364 Applied Research Collaboration East of England (ARC EoE) programme. The views  
365 expressed are those of the authors, and not necessarily those of the NIHR, NHS or  
366 Department of Health and Social Care. We acknowledge with gratitude the generous support  
367 of Drs Dennis and Mireille Gillings in strengthening the collaboration between S.B.-C. and  
368 T.B., and between Cambridge University and the Institut Pasteur. The views expressed are  
369 those of the author(s) and not necessarily those of the NHS, the NIHR or the Department of  
370 Health. The AIMS-2-TRIALS LEAP receives support from the European Union's Horizon  
371 2020 research and innovation programme and EFPIA and AUTISM SPEAKS, Autistica,  
372 SFARI. A full list of the authors and affiliations in the AIMS-2-TRIALS LEAP group is  
373 provided in the Supplementary Information.

374

375

## 376 **References**

- 377 1. Lai M-C, Lombardo M V., Baron-Cohen S (2013): Autism. *Lancet*.  
378 [https://doi.org/10.1016/S0140-6736\(13\)61539-1](https://doi.org/10.1016/S0140-6736(13)61539-1)
- 379 2. American Psychiatric Association (2013): *Diagnostic and Statistical Manual of Mental*  
380 *Disorders (5th Ed.)*.
- 381 3. Lai M-C, Kassee C, Besney R, Bonato S, Hull L, Mandy W, *et al.* (2019): Prevalence of  
382 co-occurring mental health diagnoses in the autism population: a systematic review and  
383 meta-analysis. *The Lancet Psychiatry* 6: 819–829.
- 384 4. Bishop-Fitzpatrick L, Rubenstein E (2019): The physical and mental health of middle aged  
385 and older adults on the autism spectrum and the impact of intellectual disability. *Res*  
386 *Autism Spectr Disord* 63: 34–41.

- 387 5. Colvert E, Tick B, McEwen F, Stewart C, Curran SR, Woodhouse E, *et al.* (2015):  
388 Heritability of autism spectrum disorder in a UK population-based twin sample. *JAMA*  
389 *Psychiatry* 72: 415–23.
- 390 6. Tick B, Bolton PF, Happé F, Rutter M, Rijdsdijk F (2016): Heritability of autism spectrum  
391 disorders: A meta-analysis of twin studies. *J Child Psychol Psychiatry Allied Discip* 57:  
392 585–595.
- 393 7. Sandin S, Lichtenstein P, Kuja-Halkola R, Larsson H, Hultman CM, Reichenberg A  
394 (2014): The familial risk of autism. *JAMA* 311: 1770–7.
- 395 8. Bai D, Yip BHK, Windham GC, Sourander A, Francis R, Yoffe R, *et al.* (2019):  
396 Association of Genetic and Environmental Factors With Autism in a 5-Country Cohort.  
397 *JAMA Psychiatry* 76: 1035.
- 398 9. Grove J, Ripke S, Als TD, Mattheisen M, Walters RK, Won H, *et al.* (2019): Identification  
399 of common genetic risk variants for autism spectrum disorder. *Nat Genet* 51: 431–444.
- 400 10. Sanders SJ, He X, Willsey AJ, Ercan-Sencicek AG, Samocha KE, Cicek AE, *et al.*  
401 (2015): Insights into Autism Spectrum Disorder genomic architecture and biology from  
402 71 risk loci. *Neuron* 87: 1215–33.
- 403 11. Satterstrom FK, Kosmicki JA, Wang J, Breen MS, Rubeis S De, An J-Y, *et al.* (2018):  
404 Novel genes for autism implicate both excitatory and inhibitory cell lineages in risk.  
405 *bioRxiv* 484113.
- 406 12. Yuen RKC, Thiruvahindrapuram B, Merico D, Walker S, Tammimies K, Hoang N, *et al.*  
407 (2015): Whole-genome sequencing of quartet families with autism spectrum disorder.  
408 *Nat Med* 21: 185–91.
- 409 13. Weiner DJ, Wigdor EM, Ripke S, Walters RK, Kosmicki JA, Grove J, *et al.* (2017):  
410 Polygenic transmission disequilibrium confirms that common and rare variation act  
411 additively to create risk for autism spectrum disorders. *Nat Genet.*  
412 <https://doi.org/10.1038/ng.3863>
- 413 14. Waterhouse L, London E, Gillberg C (2016): ASD Validity. *Rev J Autism Dev Disord* 3:  
414 302–329.
- 415 15. Shuster J, Perry A, Bebko J, Toplak ME (2014): Review of Factor Analytic Studies  
416 Examining Symptoms of Autism Spectrum Disorders. *J Autism Dev Disord* 44: 90–110.
- 417 16. Mandy WPL, Skuse DH (2008): Research Review: What is the association between the  
418 social-communication element of autism and repetitive interests, behaviours and  
419 activities? *J Child Psychol Psychiatry* 49: 795–808.
- 420 17. Frazier TW, Youngstrom EA, Speer L, Embacher R, Law P, Constantino J, *et al.* (2012):  
421 Validation of Proposed DSM-5 Criteria for Autism Spectrum Disorder. *J Am Acad Child*  
422 *Adolesc Psychiatry* 51: 28–40.e3.
- 423 18. Warrier V, Toro R, Won H, Leblond CS, Cliquet F, Delorme R, *et al.* (2019): Social and  
424 non-social autism symptoms and trait domains are genetically dissociable. *Commun Biol*  
425 2: 328.
- 426 19. Greenberg DM, Warrier V, Allison C, Baron-Cohen S (2018): Testing the Empathizing-  
427 Systemizing theory of sex differences and the Extreme Male Brain theory of autism in  
428 half a million people. *Proc Natl Acad Sci U S A* 201811032.
- 429 20. Pickles A, McCauley JB, Pepa LA, Huerta M, Lord C (2020): The adult outcome of  
430 children referred for autism: typology and prediction from childhood. *J Child Psychol*  
431 *Psychiatry* jcpp.13180.
- 432 21. Anderson DK, Liang JW, Lord C (2014): Predicting young adult outcome among more  
433 and less cognitively able individuals with autism spectrum disorders. *J Child Psychol*  
434 *Psychiatry* 55: 485–94.
- 435 22. Fischbach GD, Lord C (2010): The Simons Simplex Collection: A Resource for  
436 Identification of Autism Genetic Risk Factors. *Neuron* 68: 192–195.

- 437 23. Geschwind DH, Sowinski J, Lord C, Iversen P, Shestack J, Jones P, *et al.* (2001): The  
438 autism genetic resource exchange: a resource for the study of autism and related  
439 neuropsychiatric conditions. *Am J Hum Genet* 69: 463–6.
- 440 24. Charman T, Loth E, Tillmann J, Crawley D, Wooldridge C, Goyard D, *et al.* (2017): The  
441 EU-AIMS Longitudinal European Autism Project (LEAP): clinical characterisation. *Mol*  
442 *Autism* 8: 27.
- 443 25. Das S, Forer L, Schönherr S, Sidore C, Locke AE, Kwong A, *et al.* (2016): Next-  
444 generation genotype imputation service and methods. *Nat Genet* 48: 1284–1287.
- 445 26. Gibbs RA, Boerwinkle E, Doddapaneni H, Han Y, Korchina V, Kovar C, *et al.* (2015): A  
446 global reference for human genetic variation. *Nature* 526: 68–74.
- 447 27. Dudbridge F (2013): Power and Predictive Accuracy of Polygenic Risk Scores ((N. R.  
448 Wray, editor)). *PLoS Genet* 9: e1003348.
- 449 28. Lee JJ, Wedow R, Okbay A, Kong E, Maghzian O, Zacher M, *et al.* (2018): Gene  
450 discovery and polygenic prediction from a genome-wide association study of  
451 educational attainment in 1.1 million individuals. *Nat Genet* 50: 1112–1121.
- 452 29. Savage JE, Jansen PR, Stringer S, Watanabe K, Bryois J, de Leeuw CA, *et al.* (2018):  
453 Genome-wide association meta-analysis in 269,867 individuals identifies new genetic  
454 and functional links to intelligence. *Nat Genet* 1.
- 455 30. Lam M, Chen C-Y, Li Z, Martin AR, Bryois J, Ma X, *et al.* (2019): Comparative genetic  
456 architectures of schizophrenia in East Asian and European populations. *Nat Genet* 1–9.
- 457 31. Euesden J, Lewis CM, O’Reilly PF (2015): PRSice: Polygenic Risk Score software.  
458 *Bioinformatics* 31: 1466–1468.
- 459 32. Lai M-C, Lombardo M V., Auyeung B, Chakrabarti B, Baron-Cohen S (2015):  
460 Sex/gender differences and autism: setting the scene for future research. *J Am Acad*  
461 *Child Adolesc Psychiatry* 54: 11–24.
- 462 33. Satterstrom F, Kosmicki J, J W, MS B, S DR, JY A, *et al.* (2020): Large-Scale Exome  
463 Sequencing Study Implicates Both Developmental and Functional Changes in the  
464 Neurobiology of Autism. *Cell* 180. <https://doi.org/10.1016/J.CELL.2019.12.036>
- 465 34. Sanders SJ, He X, Willsey AJ, Devlin B, Roeder K, State MW, *et al.* (2015): Insights into  
466 Autism Spectrum Disorder Genomic Architecture and Biology from 71 Risk Loci  
467 Article Insights into Autism Spectrum Disorder Genomic Architecture and Biology from  
468 71 Risk Loci. *Neuron* 87: 1215–1233.
- 469 35. Bishop SL, Farmer C, Bal V, Robinson EB, Willsey AJ, Werling DM, *et al.* (2017):  
470 Identification of Developmental and Behavioral Markers Associated With Genetic  
471 Abnormalities in Autism Spectrum Disorder. *Am J Psychiatry* 174: 576–585.
- 472 36. von Hippel PT (2015): The heterogeneity statistic I(2) can be biased in small meta-  
473 analyses. *BMC Med Res Methodol* 15: 35.
- 474 37. A B, N V, AM K, C, Lord, AE L, M W, II (2018): Damaging de novo mutations  
475 diminish motor skills in children on the autism spectrum. *Proc Natl Acad Sci U S A* 115.  
476 <https://doi.org/10.1073/PNAS.1715427115>
- 477 38. Ganna A, Genovese G, Howrigan DP, Byrnes A, Kurki MI, Zekavat SM, *et al.* (2016):  
478 Ultra-rare disruptive and damaging mutations influence educational attainment in the  
479 general population. *Nat Neurosci* 19: 1563–1565.
- 480 39. Robinson EB, St Pourcain B, Anttila V, Kosmicki JA, Bulik-Sullivan BK, Grove J, *et al.*  
481 (2016): Genetic risk for autism spectrum disorders and neuropsychiatric variation in the  
482 general population. *Nat Genet* 48: 552–5.
- 483 40. St Pourcain B, Robinson EB, Anttila V, Sullivan BB, Maller J, Golding J, *et al.* (2017):  
484 ASD and schizophrenia show distinct developmental profiles in common genetic  
485 overlap with population-based social communication difficulties. *Mol Psychiatry*.  
486 <https://doi.org/10.1038/mp.2016.198>

- 487 41. Evans DW, Uljarević M, Lusk LG, Loth E, Frazier T (2017): Development of Two  
488 Dimensional Measures of Restricted and Repetitive Behavior in Parents and Children. *J*  
489 *Am Acad Child Adolesc Psychiatry* 56: 51–58.
- 490 42. Riglin L, Collishaw S, Richards A, Thapar AK, Maughan B, O’Donovan MC, Thapar A  
491 (2017): Schizophrenia risk alleles and neurodevelopmental outcomes in childhood: a  
492 population-based cohort study. *The lancet Psychiatry* 4: 57–62.
- 493 43. Mallard TT, Linnér RK, Okbay A, Grotzinger AD, Vlaming R de, Meddens SFW, *et al.*  
494 (2019): Not just one p: Multivariate GWAS of psychiatric disorders and their cardinal  
495 symptoms reveal two dimensions of cross-cutting genetic liabilities. *bioRxiv* 603134.
- 496 44. Knott F, Dunlop A-W, Mackay T (2006): Living with ASD: how do children and their  
497 parents assess their difficulties with social interaction and understanding? *Autism* 10:  
498 609–17.
- 499 45. Johnson SA, Filliter JH, Murphy RR (2009): Discrepancies between self- and parent-  
500 perceptions of autistic traits and empathy in high functioning children and adolescents  
501 on the autism spectrum. *J Autism Dev Disord* 39: 1706–14.
- 502 46. Singh T, Kurki MI, Curtis D, Purcell SM, Crooks L, McRae J, *et al.* (2016): Rare loss-of-  
503 function variants in SETD1A are associated with schizophrenia and developmental  
504 disorders. *Nat Neurosci* 19: 571–577.
- 505



506 **Figure 1: Heatmap of the phenotypic correlations in the three cohorts**

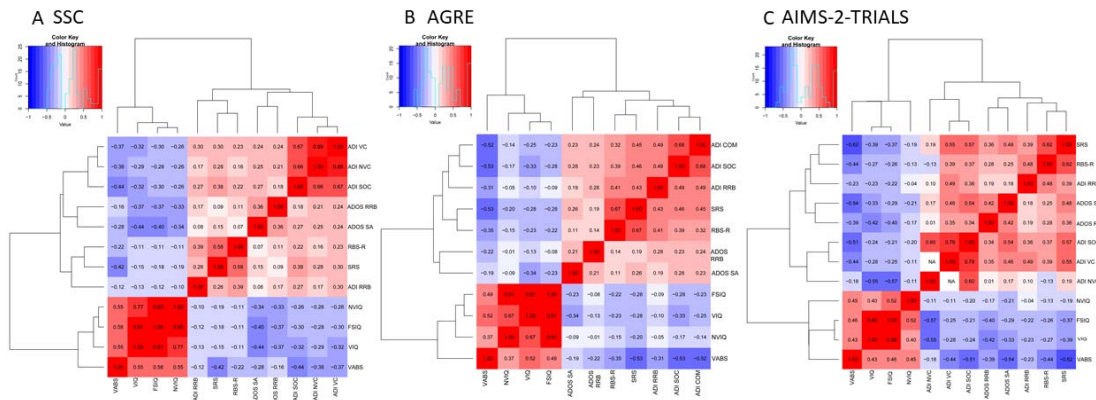

507  
 508 *This figure provides the correlation heatmap for the correlations for autism core features,*  
 509 *IQ, and adaptive behaviour in the: A. SSC; B. AGRE; and C: AIMS-2-TRIALS LEAP cohorts.*  
 510 *Hierarchical clustering tree is also provided for each of the plots. Red colour indicates a*  
 511 *positive correlation, while blue indicates a negative correlation. Individual plots for each*  
 512 *cohort with greater resolution is provided in eFigures 1 – 3. Separate verbal communication*  
 513 *and non-verbal communication ADI scores (ADI VC and ADI NVC) were not available for*  
 514 *the AIMS-2-TRIALS LEAP, so we used a composite ADI communication score (ADI COM).*  
 515 *Additionally, we did not identify individuals who had both ADI VC and ADI NVC scores in*  
 516 *the AGRE cohort, and hence could not calculate the correlations between these two subscales*  
 517 *in the AGRE cohort. The features are: ADOS - Social Affect (ADOS SA); ADOS - Restricted*  
 518 *and Repetitive Behaviour domain total score (ADOS RRB); ADI - Communication (verbal)*  
 519 *domain total score (ADI VC); ADI - Communication (nonverbal) domain total score (ADI*  
 520 *NVC); ADI - Restricted and repetitive behaviour domain total score (ADI RRB); ADI -*  
 521 *Social domain total score (ADI SOC); Repetitive Behaviour Scale – Revised (RBS-R);*  
 522 *Vineland Adaptive Behaviour Composite Standard scores (VABS); Parent-reported Social*  
 523 *Responsiveness Scale - Total raw scores (SRS); Full-scale IQ (FSIQ); Verbal IQ (VIQ); and*  
 524 *Non-verbal IQ (NVIQ).*

525 **Figure 2: Correlations of correlations among pairs of autism core and associated**  
526 **features across the three cohorts**

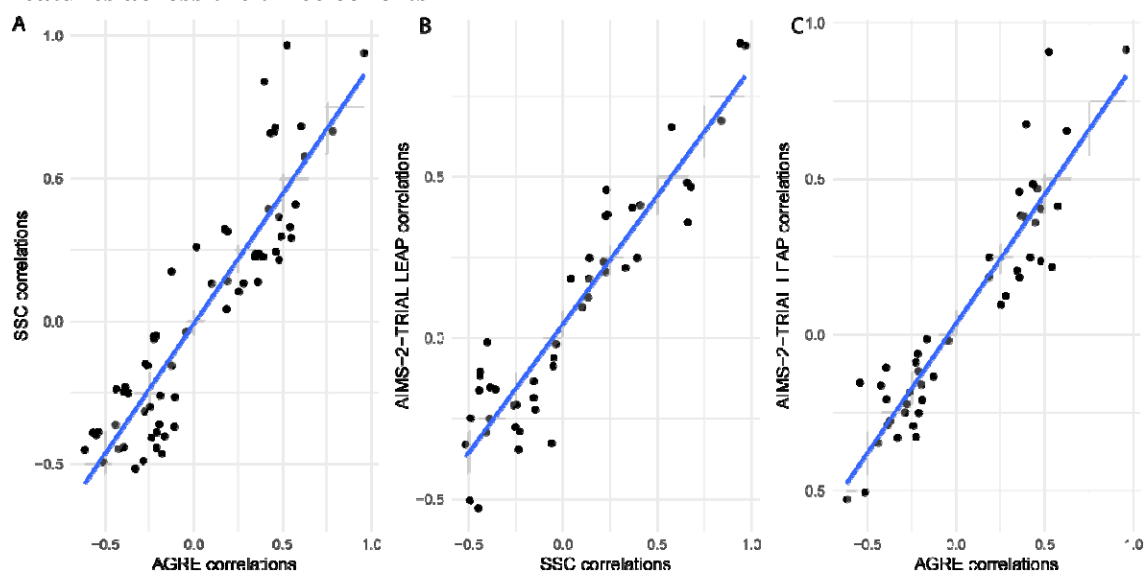

527  
528 *This figure provides the correlation between the correlation coefficients of pairs of core and*  
529 *associated autism features in two datasets. A: Between the SSC and AGRE ( $r = 0.89$ ,  $p$ -value*  
530  *$< 2 \times 10^{-16}$ ); B: Between AIMS-2-TRIALS LEAP and SSC ( $r = 0.92$ ,  $p$ -value  $< 2 \times 10^{-16}$ ); and C:*  
531 *Between AIMS-2-TRIALS and AGRE ( $r = 0.92$ ,  $p$ -value  $< 2 \times 10^{-16}$ ). Pearson's correlation*  
532 *coefficient was calculated. The shaded portion of the line indicates the 95% confidence*  
533 *interval for the correlation.*

534 **Figure 3: Polygenic score association of the three phenotypes with the autism core**  
 535 **features, measures of IQ, and adaptive behaviour**

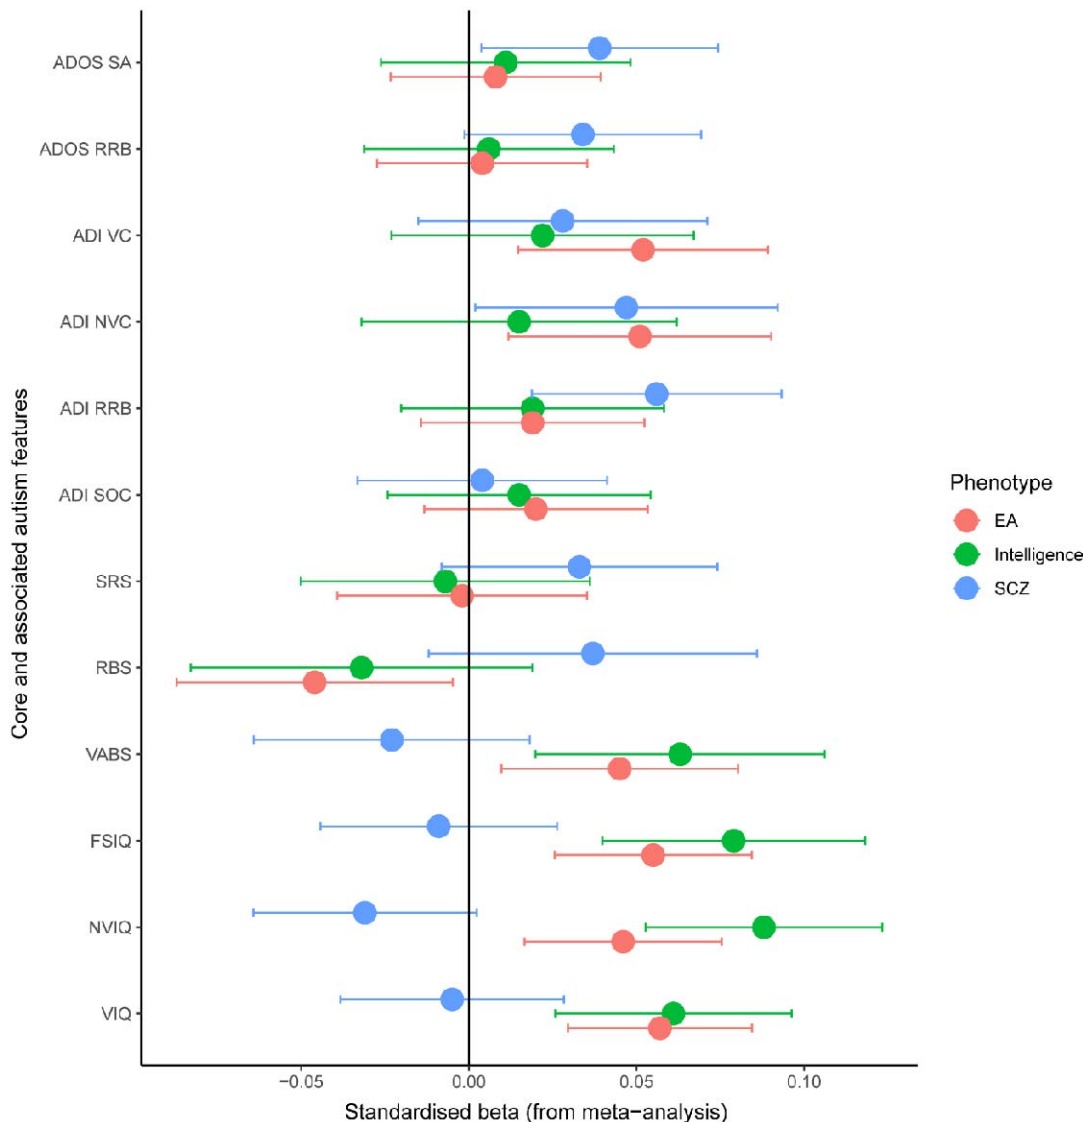

536  
 537 *This figure provides the meta-analysed regression Beta and the associated 95% confidence*  
 538 *intervals for the three phenotypes (EA = educational attainment in red, SCZ = schizophrenia*  
 539 *in blue, and intelligence in green) against the core autism features, measures of IQ, and*  
 540 *adaptive behaviour. These are: ADOS - Social Affect (ADOS SA); ADOS - Restricted and*  
 541 *Repetitive Behaviour domain total score (ADOS RRB); ADI - Communication (verbal)*  
 542 *domain total score (ADI VC); ADI - Communication (nonverbal) domain total score (ADI*  
 543 *NVC); ADI - Restricted and repetitive behaviour domain total score (ADI RRB); ADI -*  
 544 *Social domain total score (ADI SOC); Repetitive Behaviour Scale – Revised (RBS); Vineland*  
 545 *Adaptive Behaviour Composite Standard scores (VABS); Parent-reported Social*  
 546 *Responsiveness Scale - Total raw scores (SRS); Full-scale IQ (FSIQ); Verbal IQ (VIQ); and*  
 547 *Non-verbal IQ (NVIQ).*

548  
 549
